# Supplementary figures and images for: The long non-coding RNA Cerox1 is a post transcriptional regulator of mitochondrial complex I catalytic activity
Source: eLife journal article supplement (doi:10.7554/elife.45051), 2019-05-02

Figure 3 - figure supplement 1

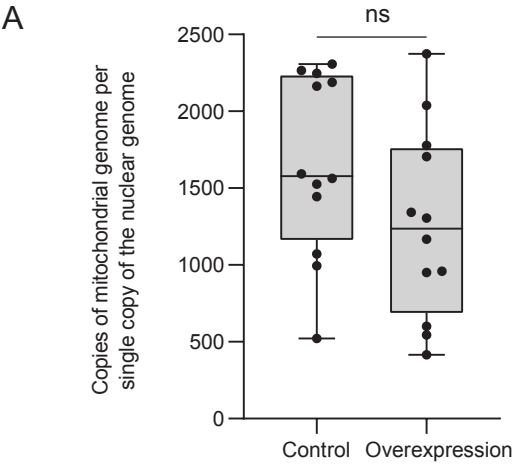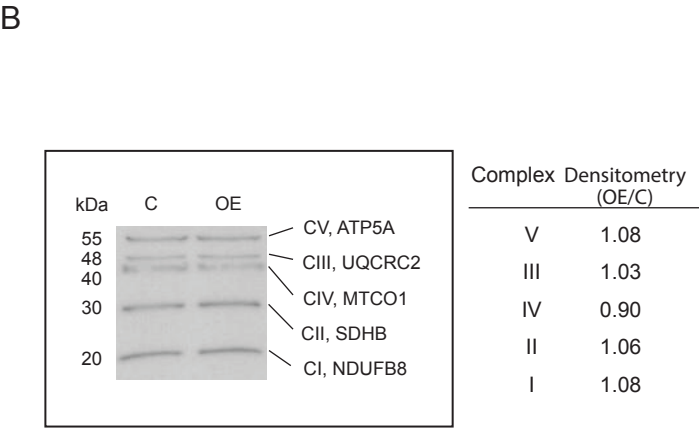

Supplement: supp [file elife-45051-supp-v1.zip]

Figure 5 - figure supplement 1

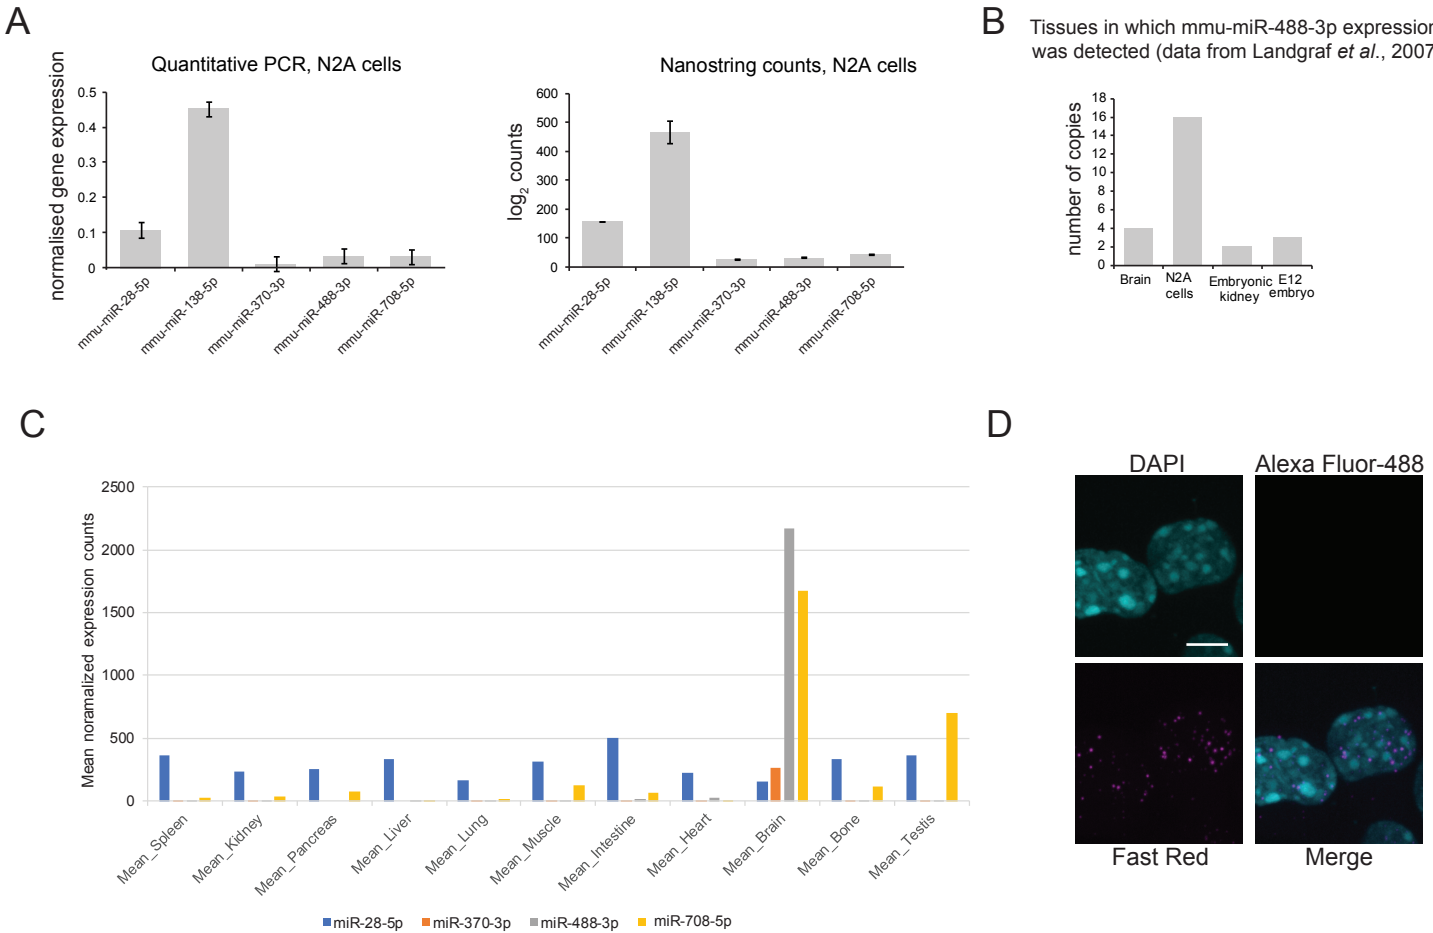

Supplement: supp [file elife-45051-supp-v1.zip]

Figure 2 - figure supplement 1

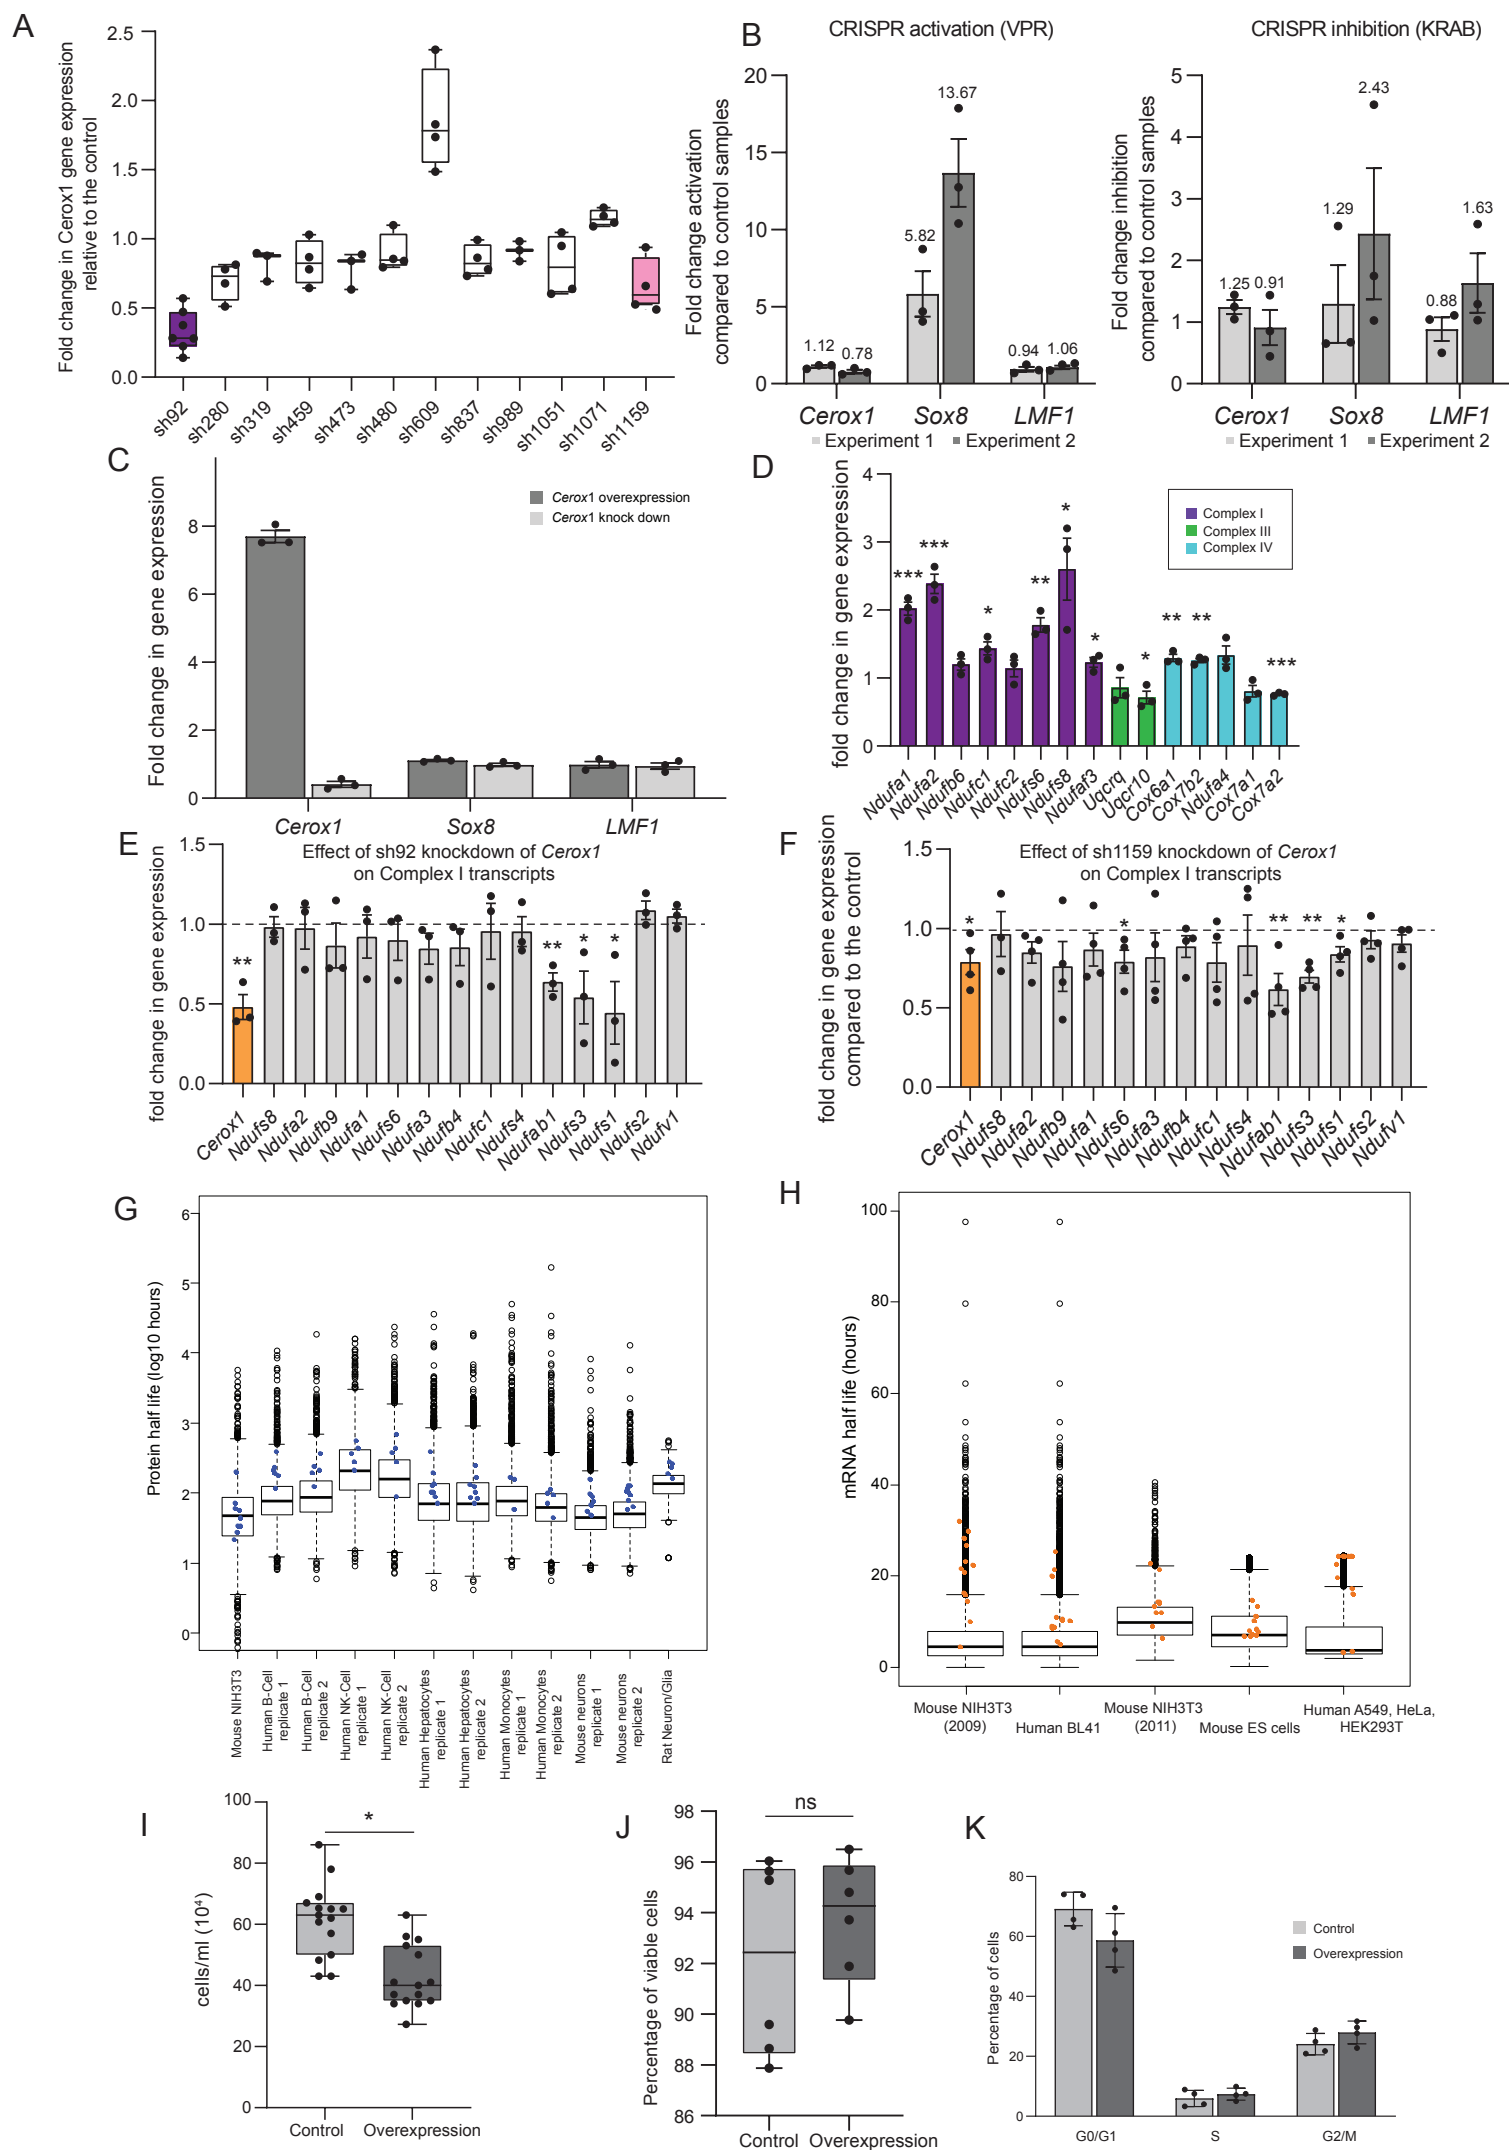

Supplement: supp [file elife-45051-supp-v1.zip]

Figure 1 - figure supplement 1

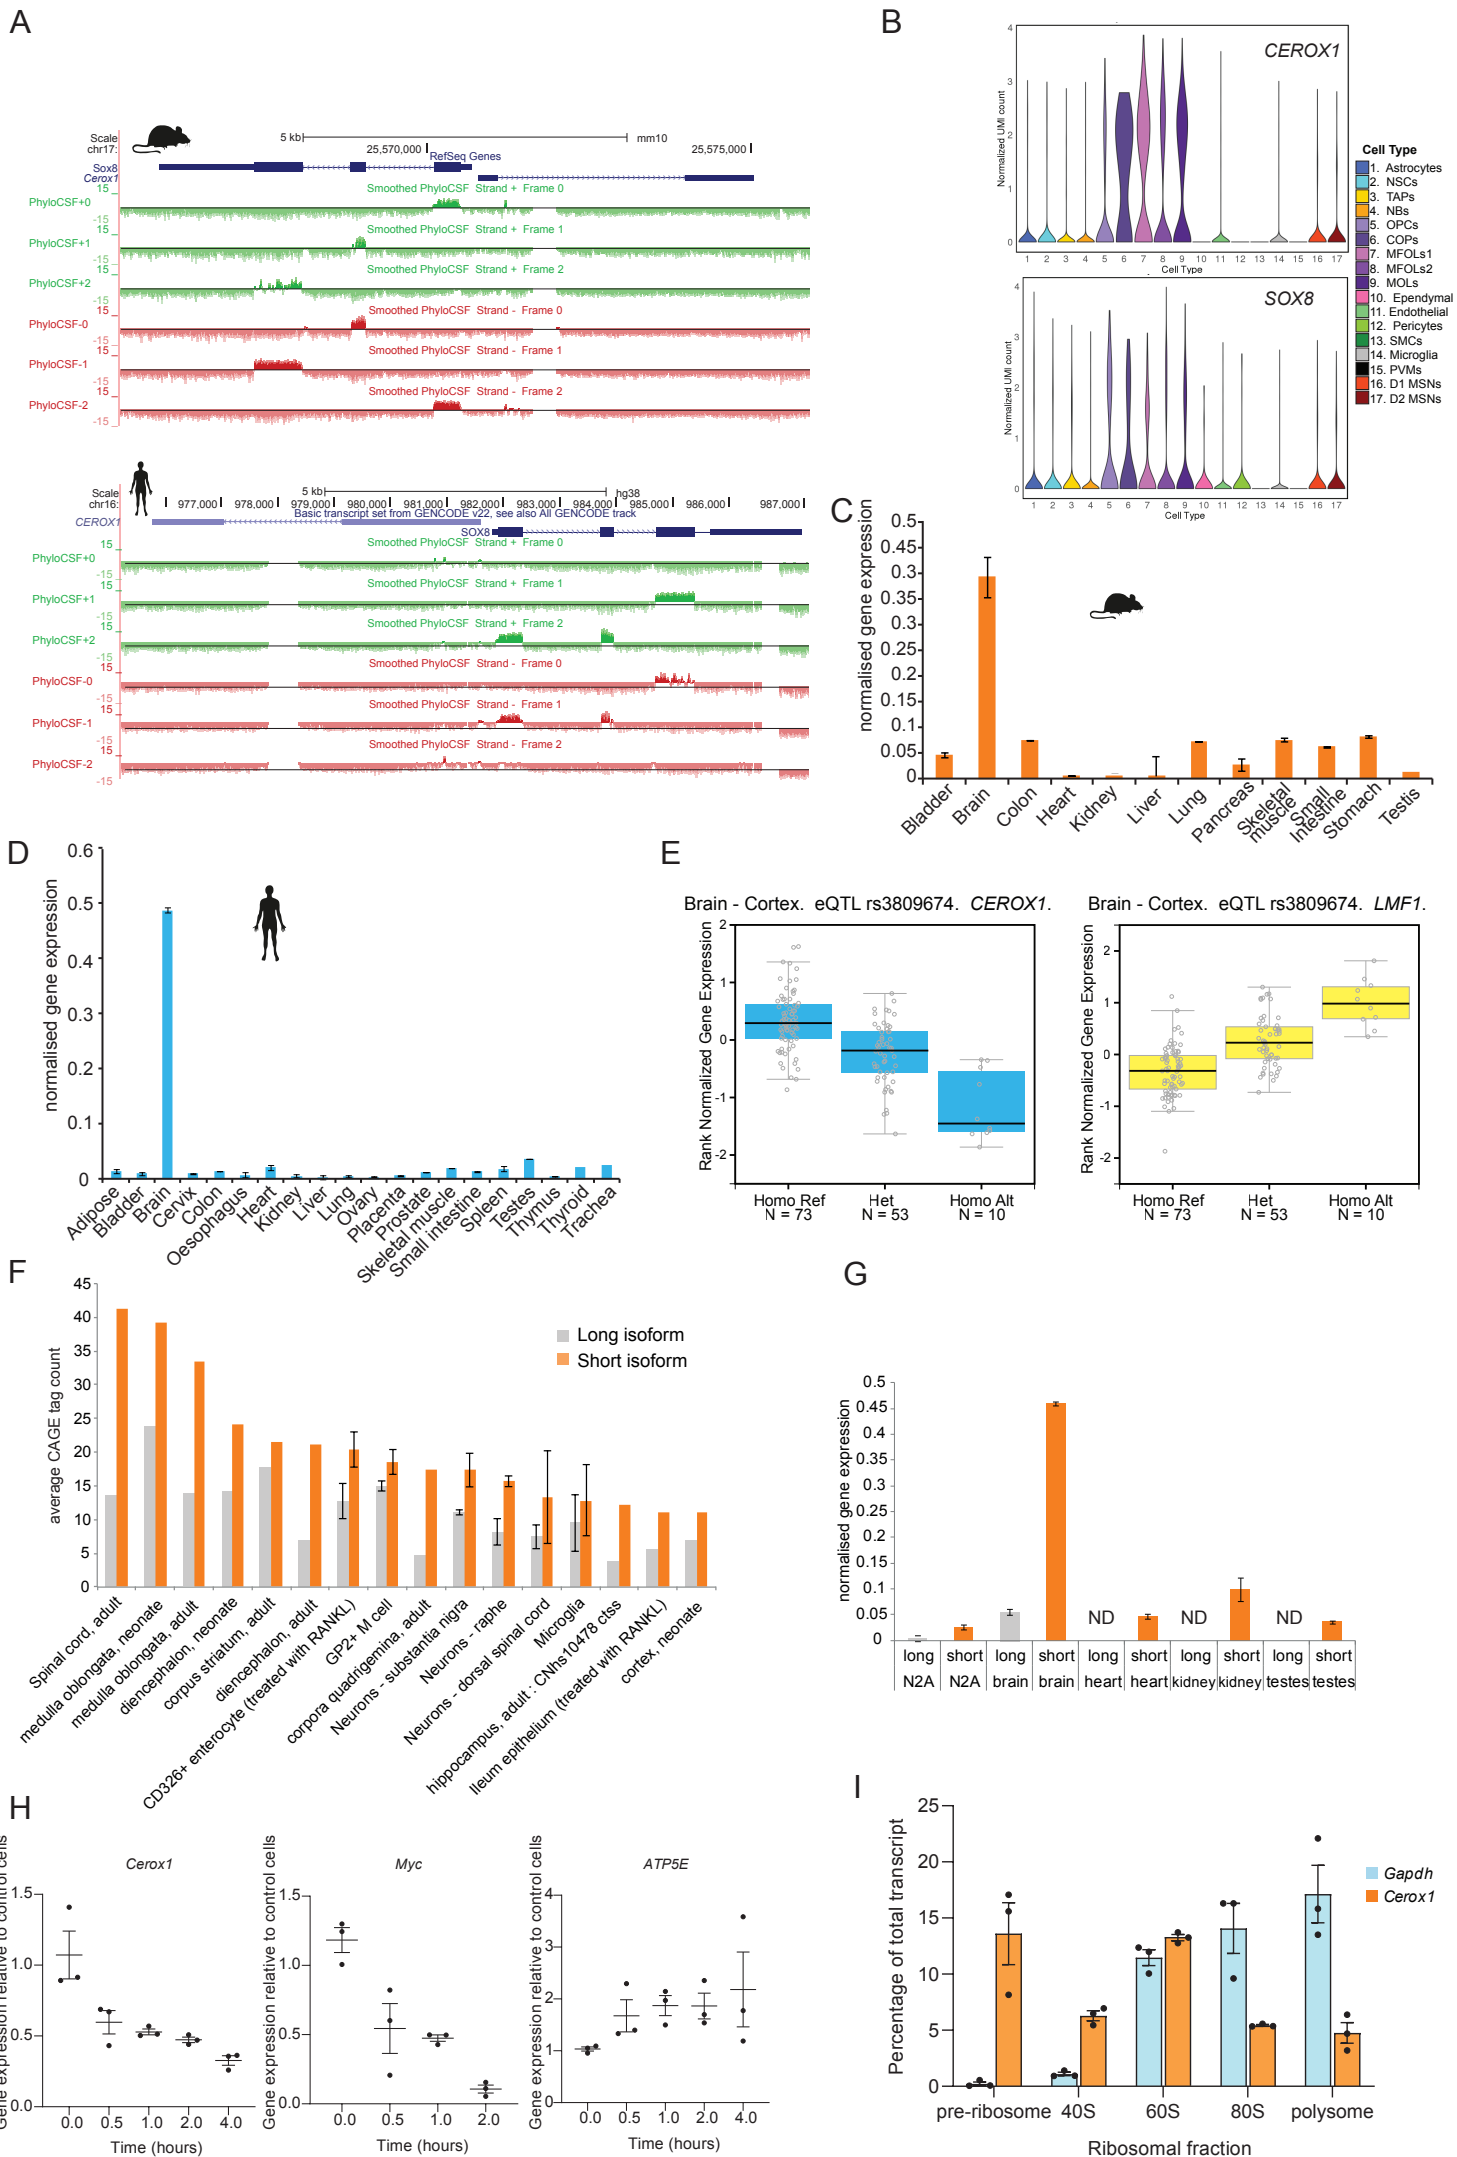

Supplement: supp [file elife-45051-supp-v1.zip]
